# Supplementary material
Source: PubMed Central journal article supplement (PMC7181257)
Supplement: es9b07207_si_001.pdf [file es9b07207_si_001.pdf]

## **Supplemental material for:**

# Decorating the Anammox House: Sialic Acids and Sulfated Glycosaminoglycans in the Extracellular Polymeric Substances of Anammox Granular Sludge

*Marissa Boleij<sup>1</sup>, Hugo Kleikamp<sup>1</sup>, Martin Pabst<sup>1</sup>, Thomas R. Neu<sup>2</sup>, Mark C.M. van  
Loosdrecht<sup>1</sup>, Yuemei Lin<sup>1\*</sup>*

<sup>1</sup> Department of Biotechnology, Delft University of Technology, van der Maasweg 9, 2629  
HZ, Delft, The Netherlands

<sup>2</sup> Department of River Ecology, Helmholtz Centre for Environmental Research – UFZ,  
Brueckstrasse 3A, 39114 Magdeburg, Germany

---

\* **Corresponding author:** Yuemei Lin, [Yuemei.Lin@tudelft.nl](mailto:Yuemei.Lin@tudelft.nl)

## Content Supplemental material

### Supplemental Figures

|                                                           |    |
|-----------------------------------------------------------|----|
| Figure S1. Pathways for biosynthesis of sialic acids..... | S3 |
| Figure S2. SDS-PAGE gels.....                             | S4 |
| Figure S3. CLSM of Herparin Red.....                      | S5 |

### Supplemental Tables

|                                                                        |    |
|------------------------------------------------------------------------|----|
| Table S1. Mass spectrometric sialic acid analysis .....                | S6 |
| Table S2. BLAST results against enzymes from sialic acid pathways..... | S7 |

Supplementary Tables S3 and S4 are provided in one separate excel file

Table S3. Alignment table *Campylobacter jejuni*

Table S4. Alignment table *Halorubrum sp. PV6*

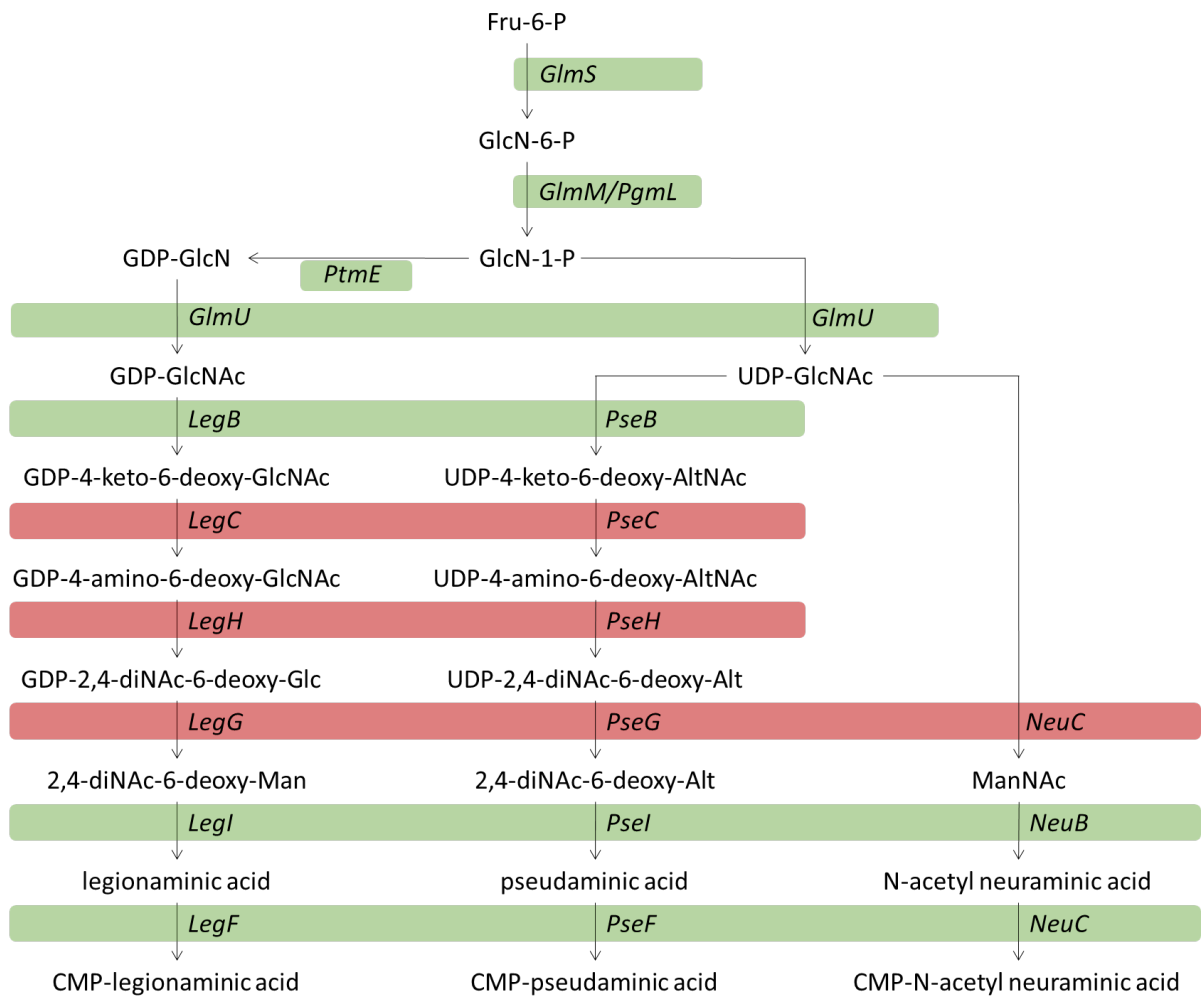

Figure S1: Pathways for the biosynthesis of legionaminic acid, pseudaminic acid and N-acetyl neuraminic acid in *Campylobacter jejuni*. Reference pathways were taken from Schoenhofen et al. (2009). The green have a match with *Ca. Brocadiales* (Table S1)

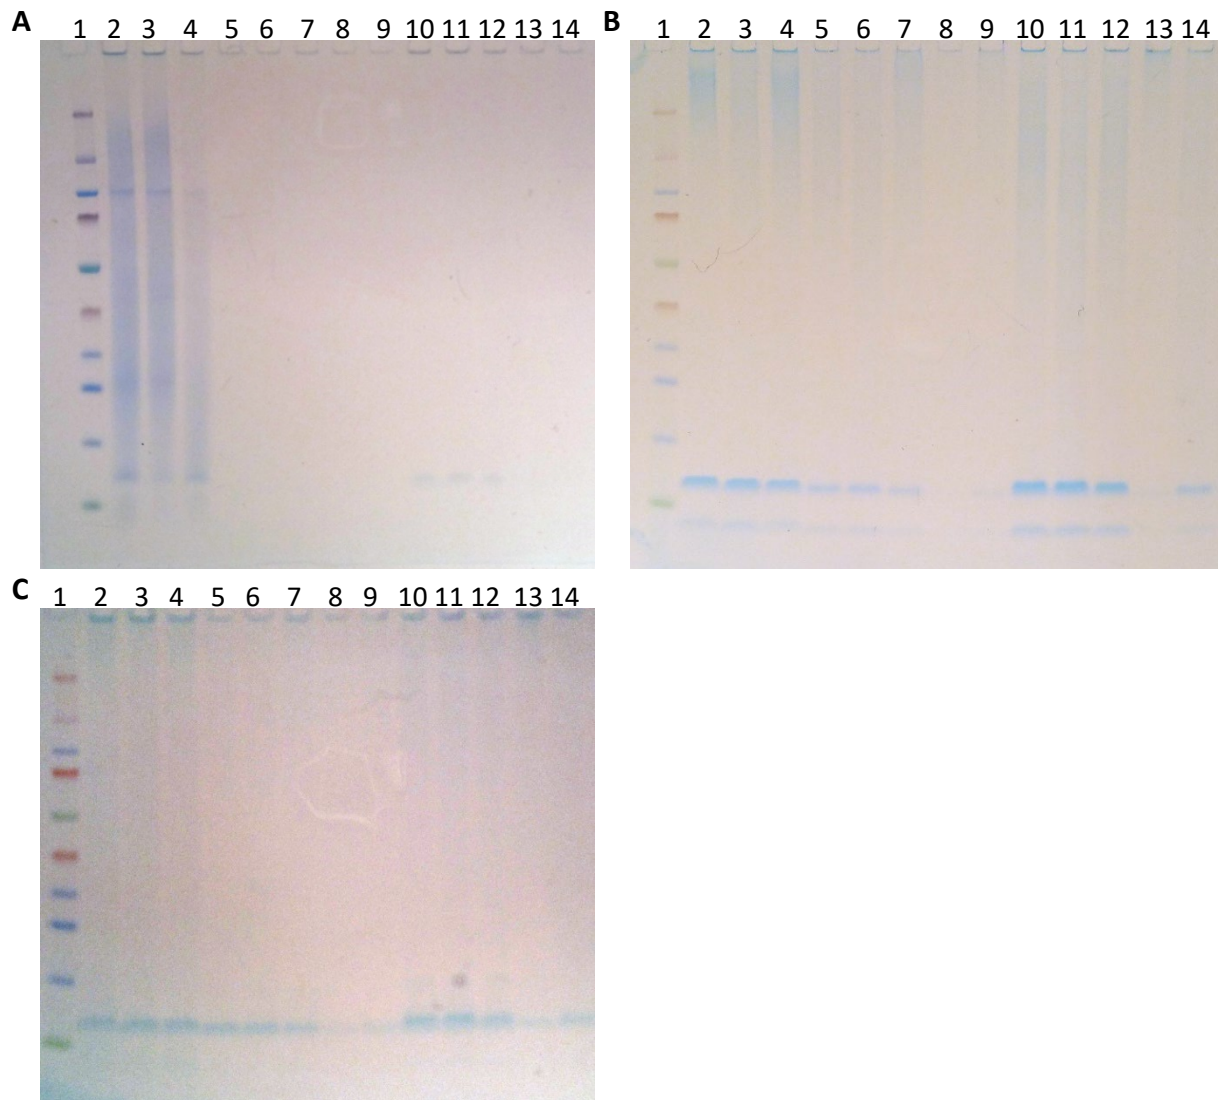

Figure S2: Images of SDS-PAGE gels. Gels were stained with A) Coomassie Blue, B) Alcian blue at pH 2.5 and C) Alcian blue at pH 1.0. The samples in the lanes are as follows: 1: MW ladder, 2: Extract 1 (pH 5), 3: Extract 2 (pH 2.5), 4: Extract 3 (dialyzed), 5: Extract 1 (pH 5) – after denaturation and enzyme treatment, 6: Extract 2 (pH 2.5) – after denaturation and enzyme treatment, 7: Extract 3 (dialyzed) – after denaturation and enzyme treatment, 8: Pellet – after denaturation and enzyme treatment, 9: Granules – after denaturation and enzyme treatment, 10: Extract 1 (pH 5) – after Blyscan, 11: Extract 2 (pH 2.5) – after Blyscan, 12: Extract 3 (dialyzed) – after Blyscan, 13: Pellet – after Blyscan, 14: Granules – after Blyscan

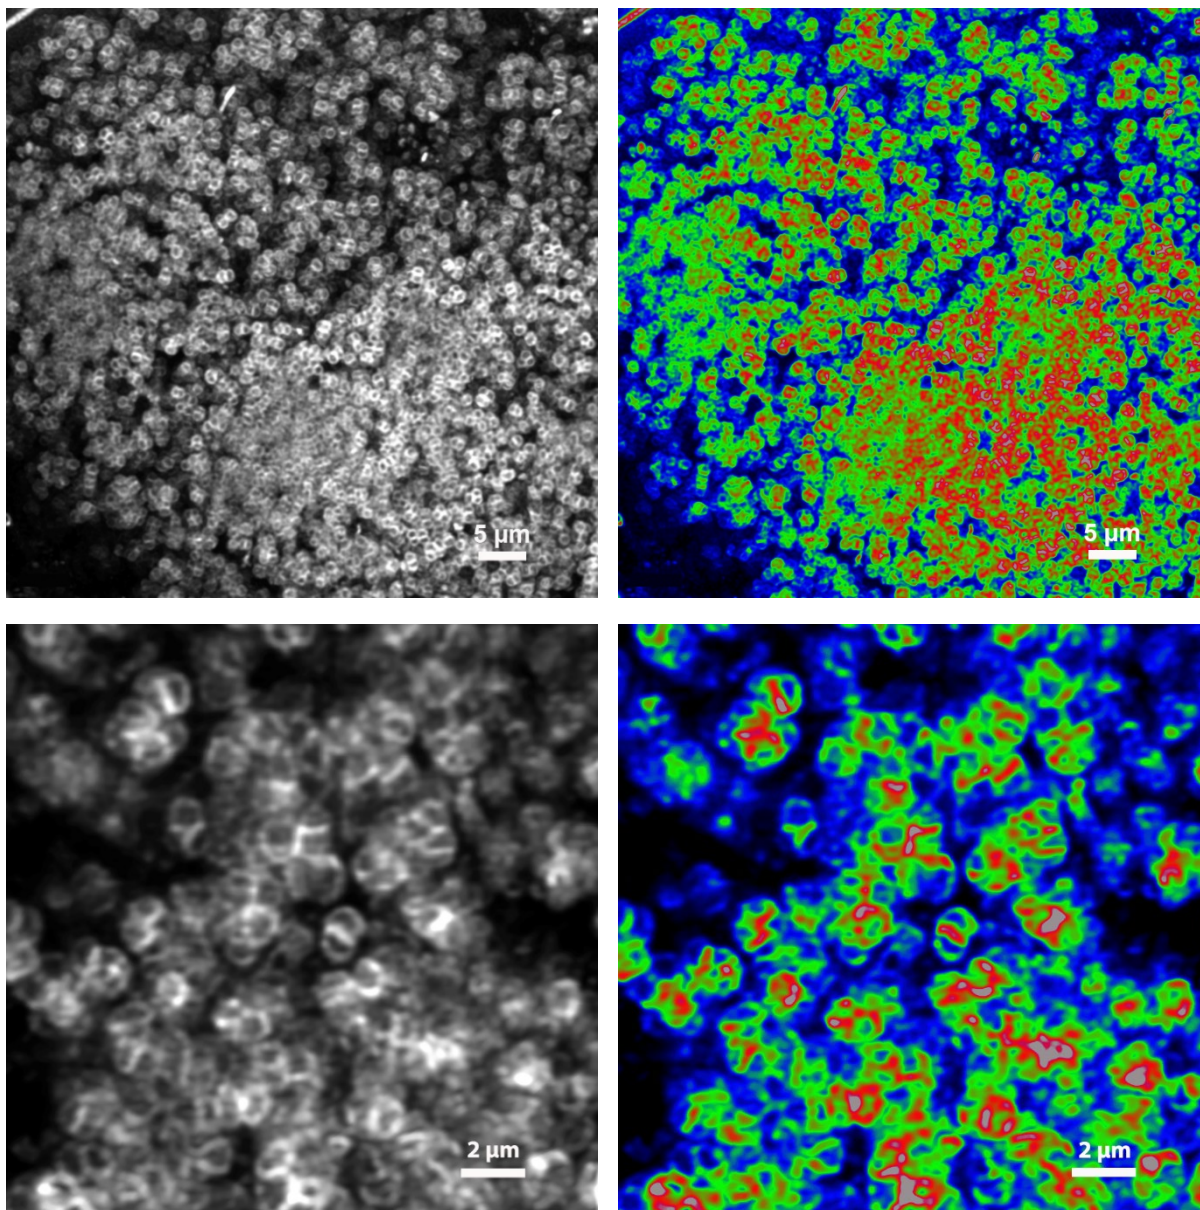

Figure S3: Confocal laser scanning microscopy of Heparin Red, bound to components in the fully hydrated, intact anammox granule. A) and C) are greyscale images of the fluorescent signal. A) and B) represents an image series of 45 optical sections at  $0.17\ \mu\text{m}$  step size shown as maximum intensity projection, C) and D) represents a single image. B) and D) are the images of A and C, respectively, converted to color images with three pixel intensities: red = binding of Heparin Red, green = quenched signal, implying high negative charge density, and blue = no binding of Heparin Red. These images are the same as presented in Figure 3 of the manuscript, but with deconvolution and therefore appear sharper. The shape of the cells is therefore more clear.

*Table S1: Mass spectrometric sialic acid analysis. The obtained (DMB-labelled) masses matched with; Pse/Leg (Pseudaminic acid/legionaminic acid), KDN (deaminated neuraminic acid), and NeuAc (N-acetyl neuraminic acid).*

| Structure | Sum formula                                                   | monoisotopic mass | mass delta (av, ppm) | run 1 | run2 |
|-----------|---------------------------------------------------------------|-------------------|----------------------|-------|------|
| Pse/Leg   | C <sub>20</sub> H <sub>26</sub> N <sub>4</sub> O <sub>8</sub> | 450.1750638       | -0.130837989         | x     | x    |
| KDN       | C <sub>16</sub> H <sub>20</sub> N <sub>2</sub> O <sub>9</sub> | 384.1168802       | 2.31439972           | x     | x    |
| NeuAc     | C <sub>18</sub> H <sub>23</sub> N <sub>3</sub> O <sub>9</sub> | 425.1434293       | -0.705173782         | x     | x    |

Table S2: Enzymes from the pathway (depicted in Figure S1) were BLASTed against the *Ca. Brocadiiales* database (NCBI). The best match is shown in this table. For the complete alignment tables see SI Table S3 (excel file).

| Gene C. jejuni | Enzyme                           | Accession nr C. jejuni | Best match Ca. Brocadiiales | Name                                                                                                      | e-value | ID (%) |
|----------------|----------------------------------|------------------------|-----------------------------|-----------------------------------------------------------------------------------------------------------|---------|--------|
| PseB           | dehydratase/epimerase            | CAL35407.1             | WP_034409924.1              | UDP-N-acetylglucosamine 4,6-dehydratase (inverting) [Candidatus Brocadiaceae bacterium S225]              | 4E-131  | 56.6   |
| PseC           | aminotransferase                 | CAL35408.1             | WP_034409923.1              | UDP-4-amino-4,6-dideoxy-N-acetyl-beta-L-altrosamine transaminase [Candidatus Brocadiaceae bacterium S225] | 5E-73   | 37.6   |
| PseH           | N-acetyl transferase             | CAL35427.1             | -                           | -                                                                                                         | -       | -      |
| PseG           | UPD-sugar hydrolase              | CAL35426.1             | -                           | -                                                                                                         | -       | -      |
| PseI           | pseudaminic acid synthase        | CAL35431.1             | TVL99718.1                  | pseudaminic acid synthase [Candidatus Brocadia sp. WS118]                                                 | 4E-92   | 44.4   |
| PseF           | CMP-pseudaminic acid synthetase  | CAL35425.1             | RIK01952.1                  | acylneuraminate cytidyltransferase family protein [Candidatus Brocadia sp.]                               | 8E-44   | 37.2   |
| LegB           | dehydratase                      | CAL35433.1             | TLD41235.1                  | UDP-glucose 4-epimerase [Candidatus Jettenia ecosi]                                                       | 2E-136  | 59.4   |
| LegC           | aminotransferase                 | CAL35434.1             | OQY98965.1                  | aminotransferase DegT [Candidatus Brocadia sp. UTAMX2]                                                    | 1E-138  | 48.7   |
| LegH           | N-acetyl transferase             | CAL35412.1             | -                           | -                                                                                                         | -       | -      |
| LegG           | Hydrolyzing 2-epimerase          | CAL35441.1             | -                           | -                                                                                                         | -       | -      |
| LegI           | legionaminic acid synthase       | CAL35440.1             | TVL99724.1                  | N-acetylneuraminate synthase [Candidatus Brocadia sp. WS118]                                              | 4E-120  | 54.6   |
| LegF           | CMP-legionaminic acid synthetase | CAL35444.1             | TVL99729.1                  | acylneuraminate cytidyltransferase family protein [Candidatus Brocadia sp. WS118]                         | 3E-35   | 35.6   |
| NeuC           | Hydrolyzing 2-epimerase          | CAL35259.1             | -                           | -                                                                                                         | -       | -      |
| NeuB           | sialic acid synthase             | CAL35258.1             | TVL99718.1                  | pseudaminic acid synthase [Candidatus Brocadia sp. WS118]                                                 | 3E-54   | 33.0   |
| NeuA           | CMP- sialic acid synthetase      | CAL35260.1             | TVL99729.1                  | acylneuraminate cytidyltransferase family protein [Candidatus Brocadia sp. WS118]                         | 4E-32   | 38.3   |
